# Supplementary material for: Long-term safety and efficacy of CART-20 cells in patients with refractory or relapsed B-cell non-Hodgkin lymphoma: 5-years follow-up results of the phase I and IIa trials
Source: PubMed Central journal article supplement (PMC5661643; doi:10.1038/sigtrans.2017.54), 2017-10-09
Supplement: sigtrans201754-s1.pdf [file sigtrans201754-s1.pdf]

## Supplementary information

### Long-term Safety and Efficacy of CART-20 Cells in Patients with Refractory or Relapsed B-Cell Non-Hodgkin Lymphoma: 5-years follow-up results of the phase I and IIa trials

Wen-ying Zhang<sup>1\*</sup>, Yang Liu<sup>2\*</sup>, Yao Wang<sup>3\*</sup>, Chun-meng Wang<sup>1</sup>, Qing-ming Yang<sup>1</sup>,  
Wei-dong Han<sup>1,3#</sup>, Hong-li Zhu<sup>2#</sup>

1 Biotherapeutic Department, Chinese PLA General Hospital, Beijing 100853, China

2 Department of Geriatric Hematology, Chinese PLA General Hospital, Beijing 100853, China

3 Department of Immunology, Institute of Basic Medicine, School of Life Sciences, Chinese PLA General Hospital, Beijing 100853, China

\*Contributed equally to this work

### Supplement Figure

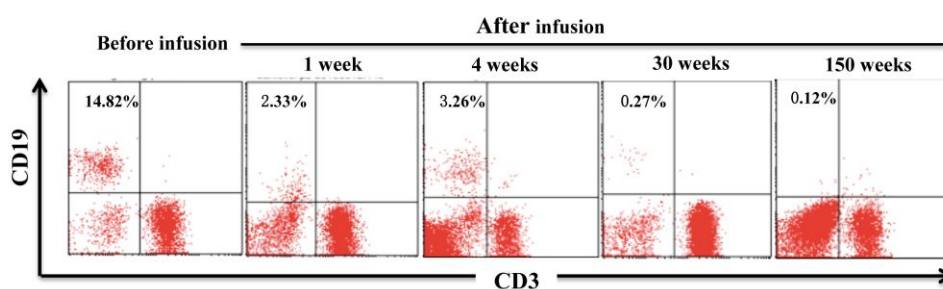

**Supplement Figure.** The CD19<sup>+</sup> lymphocyte cells also were determined by flow cytometry in PB after CART-20 cell infusion is shown. From 1 week after infusion, the proportion began to decline, and it lasted for over 150 weeks.
